# Supplementary material for: Action, actor, context, target, time (AACTT): a framework for specifying behaviour
Source: Springer Nature journal article supplement (doi:10.1186/s13012-019-0951-x), 2019-12-01
Supplement: MOESM1 [file 17474010]

Figure 1. Tool for single-actor AACTT-specification

**Action** Specify the *behaviour* that needs to change, in terms that can be observed or measured

**Actor** Specify the person/people that *do(es)* or *could do* the action targeted

**Context** Specify the physical location, emotional context, or social setting *in which* the action is performed

**Target** Specify the person/people *with/for whom* the action is performed

**Time** Specify *when* the action is performed (the time/date/frequency)

Figure 2. Tool for multiple-actor/action AACTT-specification

# Action

Specify the *behaviours* that needs to change, in terms that can be observed or measured<sup>1,2</sup>

# Actor

Specify each person/people that *do(es)* or *could do* each of the actions targeted<sup>2,3</sup>

# Context

Specify the physical location, emotional context, or social setting *in which* the action is performed

# Target

Specify the person/people *with/for whom* the action is performed<sup>4</sup>

# Time

Specify *when* the action is performed (the time/date/frequency)

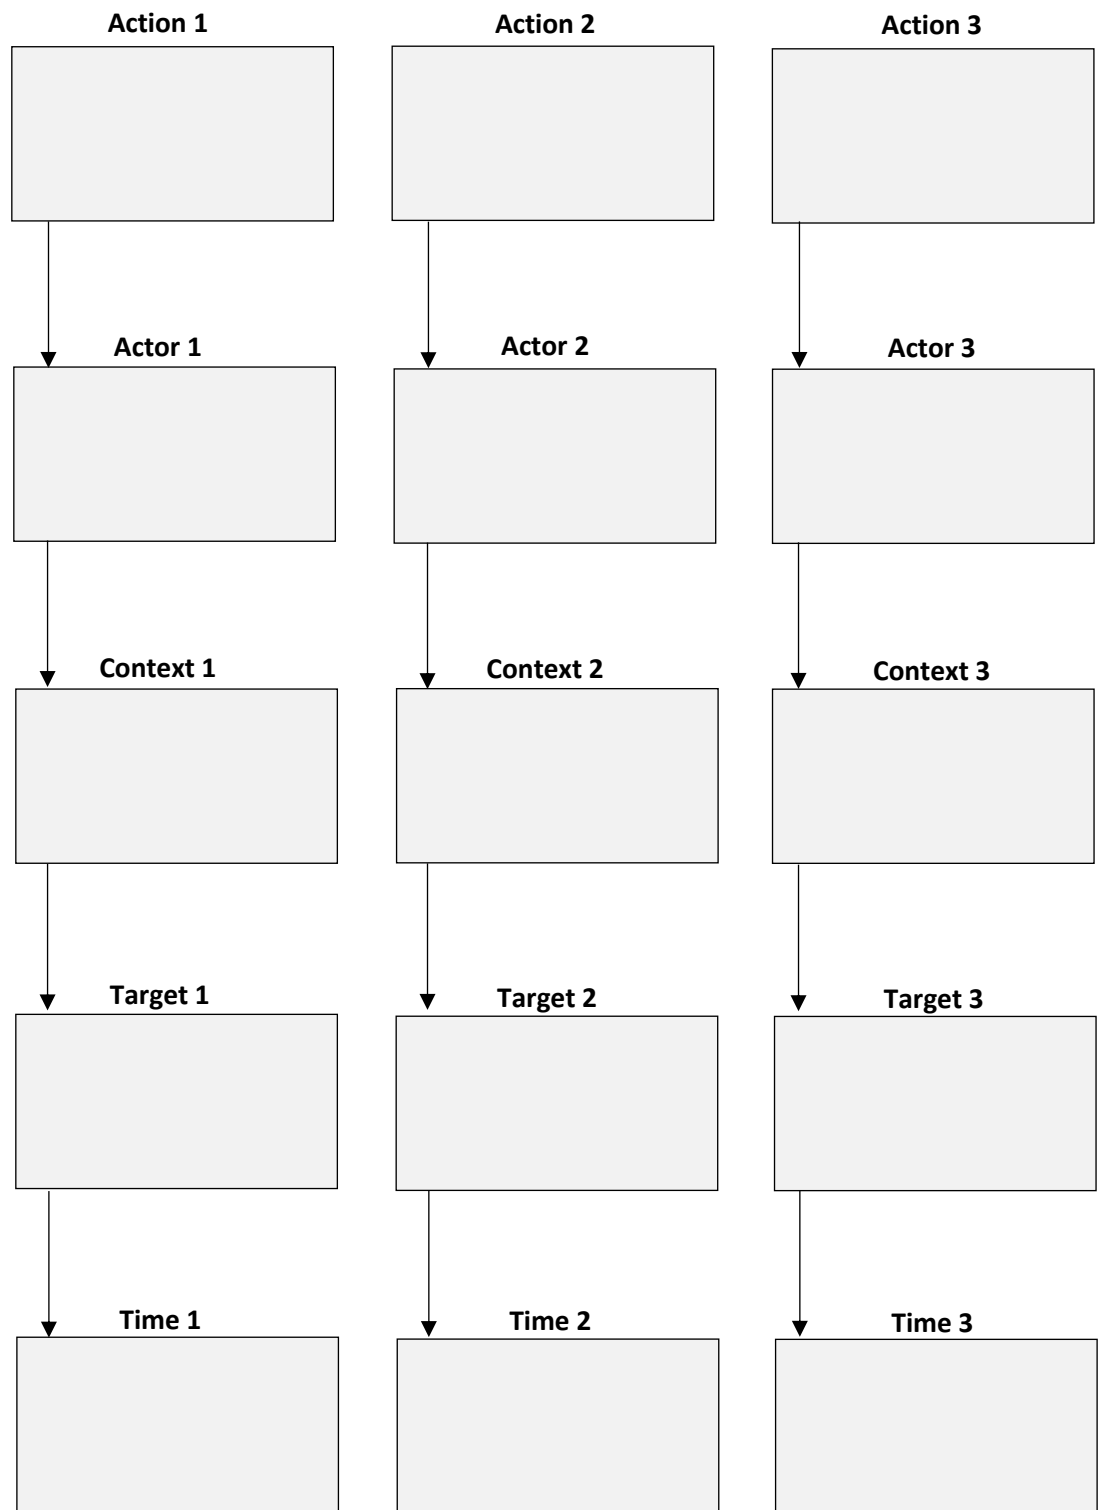

<sup>1</sup> Actions can be either a behaviour of the key actor of interest or an ancillary behaviour that supports another actor and action.

<sup>2</sup> Add arrows between behaviours when one supports another.

<sup>3</sup> Actors can be anyone at any organizational level (e.g. healthcare professional, patient, member of the public, teacher, family member, middle manager, leader)

<sup>4</sup> Actors can be different members of a team/group that work together in the same context and time or could be linked organizationally so that e.g. behaviour of a leader provides necessary capacity for a healthcare professional's behaviour

<sup>5</sup> For healthcare providers, the target might often be a patient, but could be colleague. For leaders, middle managers, the target would often be the healthcare provider
